# Supplementary material for: A novel photoluminescence sensing system sensitive for and selective to bromate anions based on carbon dots
Source: Royal Society of Chemistry journal article supplement (doi:10.1039/c6ra12936f), 2016-01-01

## Electronic Supplementary Information

### **A novel photoluminescence sensing system sensitive for and selective to bromate anions based on carbon dots**

Ping Li,<sup>ac</sup> Xiang-Ying Sun,<sup>\*b</sup> Jiang-Shan Shen<sup>b</sup> and Bin Liu<sup>b</sup>

<sup>a</sup>College of Chemical Engineering, Huaqiao University, Xiamen, 361021, China

<sup>b</sup>College of Materials Science and Engineering, Huaqiao University, Xiamen, 361021, China

<sup>c</sup>Department of Chemistry, Ningde Normal University, Ningde, 352100, China

\*Correspondence to sunxy@hqu.edu.cn, liumy@hqu.edu.cn (S. Xiangying), Tel:+86-592-6162231, Fax: +86-592-6160088.

## **Table of contents in Electronic Supplementary Information:**

- 1 Synthesis of the CDs @ PEI
- 2 Quantum yield measurements
- 3 Figure S1: FT-IR spectra of the CDs and CDs @ PEI
- 4 Figure S2: The change of PL emission spectra of the CDs@PEI with different excitation wavelength
- 5 Figure S3-S4: Against photobleaching and storage performance of the CDs @ PEI
- 6 Figure S5: The relationship curve between  $\Delta F/F_0$  and HCl concentration
- 7 Figure S6: The relationship curve between  $\Delta F/F_0$  and KBr concentration
- 8 Figure S7: The relationship curves between interaction time and PL intensity
- 9 Figure S8: The reproducibility of the CDs@PEI obtained from different batch of sensing  $\text{BrO}_3^-$  anions
- 10 Figure S9: The change of PL intensity of the sensing system with increasing KBr and  $\text{BrO}_3^-$  anions
- 11 The related calculation of thermodynamic

## 1 Synthesis of the CDs

0.5 g PEI and 1.0 g CA were mixed. Then, the mixed solid was dissolved by 10 mL hot water in a 25 mL beaker. The resulting solution was heated to 180 °C by an oil bath. After 20 min, most of water were evaporated, and a uniform pale-yellow gel formed. In order to avoid that the gel was scorched, 10 mL water were successively added into the beaker by dropwise and 180 °C was kept. The procedure of adding water was repeated for 10 times within 3 h [30]. The color of the gel gradually turned into deep yellow, and eventually became orange, which was indicative of the formation of the CDs @ PEI.

## 2 QY measurements

Reference on QY measurements: Lakowicz, J.R. Principles of Fluorescence Spectroscopy, 2nd Ed., 1999, Kluwer Academic/Plenum Publishers, New York. The QY of the CDs @ PEI was measured with quinine sulfate as a reference (QY = 0.54 in 0.1 M H<sub>2</sub>SO<sub>4</sub>, excited at 360 nm). QY was calculated according to the following equation:

$$QY = QY_R \frac{I OD_R n^2}{I_R OD n_R^2}$$

Where QY is the quantum yield, *I* is the measured integrated emission intensity, *n* is the refractive index, and OD is the optical density. The subscript R refers to the reference fluorophore of known QY (quinine

sulfate used in the work). In order to minimize re-absorption effects, absorbance in the 1 cm fluorescence cuvette were kept under 0.05 at the excitation wavelength.

### 3 Figure S1: FT-IR spectra of the CDs and CDs @ PEI

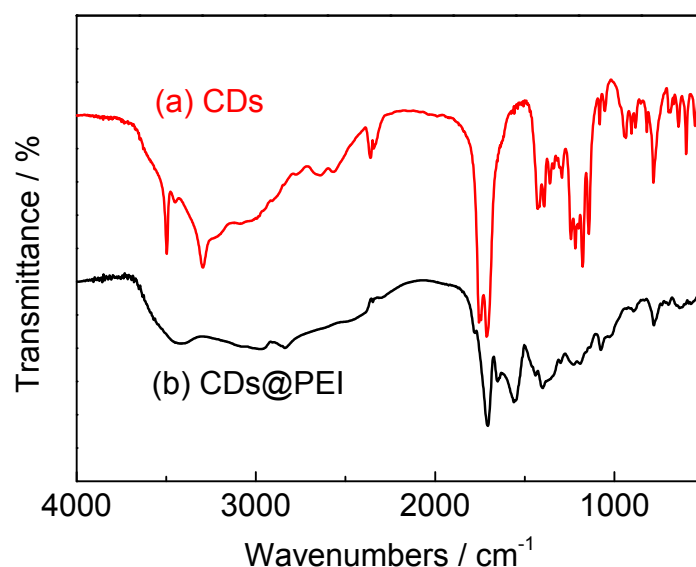

**Fig.S1.** FT-IR spectra of the CDs and CDs@PEI prepared by employing CA as the carbon source in the absence (a) and in the presence (b) of PEI as the passivation agent.

### 4 Figure S2: The change of PL emission spectra of the CDs@PEI with different excitation wavelength

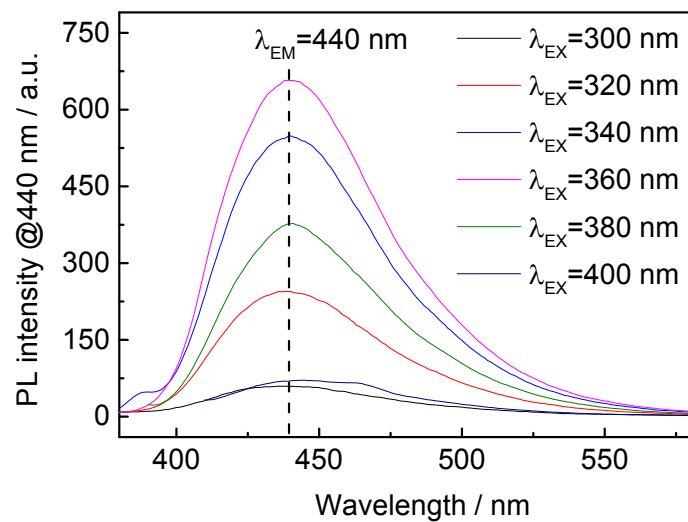

**Fig.S2.** The PL emission spectra of CDs@PEI under different excitation wavelength with 20 nm increments from 300 to 400 nm. The concentration of CDs@PEI was  $6.0 \mu\text{g mL}^{-1}$ .

## 5 Figure S3-S4: PL stability of the CDs @ PEI

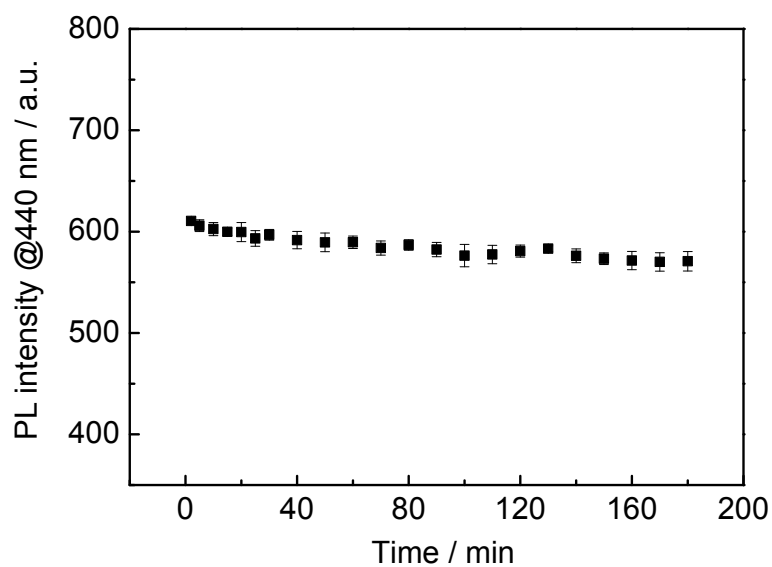

**Fig.S3.** The change of PL intensity @440 nm of CDs@PEI with various irradiation time under 365 nm UV lamp, and 3100 lux of light intensity. The concentration of CDs@PEI was  $6.0 \mu\text{g mL}^{-1}$ .

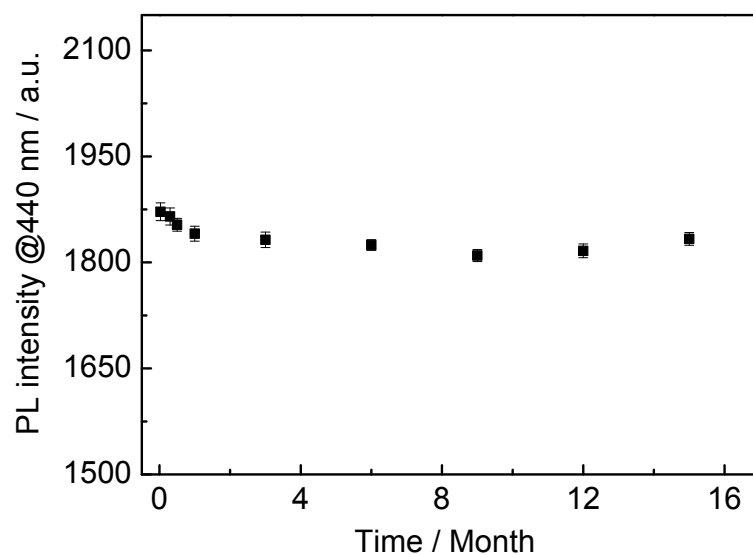

**Fig.S4.** The change of PL intensity @440 nm of CDs@PEI with various storage time. The concentration of CDs@PEI was  $18 \mu\text{g mL}^{-1}$ .

## 6 Figure S5: The relationship curve between $\Delta F/F_0$ and HCl concentration

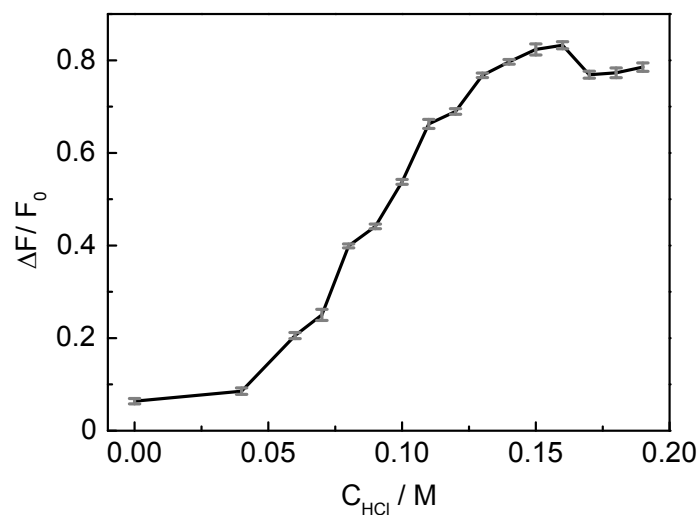

**Fig.S5.** The concentrations of CDs@PEI, KBr and  $\text{BrO}_3^-$  anions were  $6.0 \mu\text{g mL}^{-1}$ , 0.46 mM and  $0.60 \mu\text{M}$ , respectively. Interaction time was 2.5 h. The error bars were obtained from the standard deviation of three parallel measurements.

## 7 Figure S6: The relationship curve between $\Delta F/F_0$ and KBr concentration

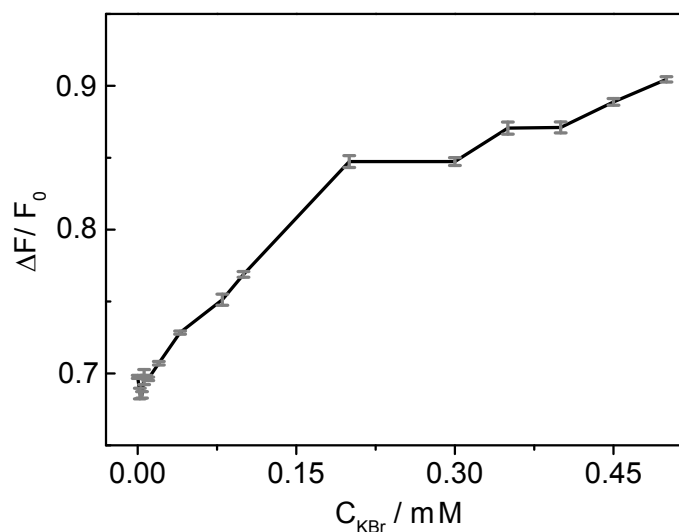

**Fig.S6.** The concentrations of CDs@PEI, HCl and  $\text{BrO}_3^-$  anions were  $6.0 \mu\text{g mL}^{-1}$ , 0.12 M and  $0.60 \mu\text{M}$ , respectively. Interaction time was 2.5 h. The error bars were obtained from the standard deviation of three parallel measurements.

## 8 Figure S7: The relationship curves between interaction time and PL intensity

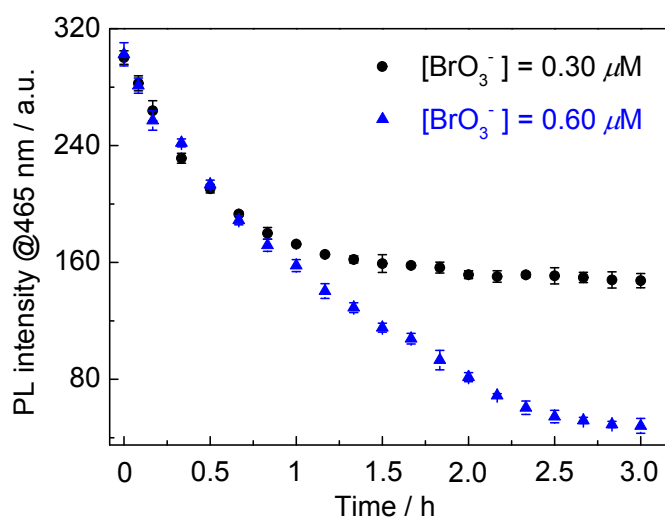

**Fig.S7.** The relationship curves between interaction time and PL intensity @465 nm under 0.30 μM (●) and 0.60 μM (▲) BrO<sub>3</sub><sup>-</sup> anions, respectively. The concentrations of CDs@PEI, HCl and KBr were 6.0 μg mL<sup>-1</sup>, 0.12 M, and 0.46 mM, respectively. The error bars were obtained from the standard deviation of three parallel measurements.

## 9 Figure S8: The reproducibility of the CDs@PEI obtained from

## different batch of sensing $\text{BrO}_3^-$ anions

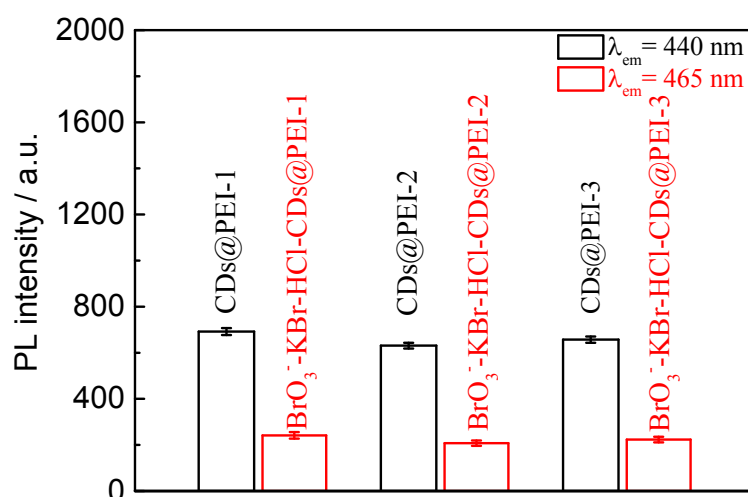

**Fig.S8.** The comparison of PL intensity at maximum emission wavelength of CQDs@PEI prepared by three batches in the absence (black bar) and in the presence (red bar) of  $\text{BrO}_3^-$ -KBr-HCl solution. The concentrations of CDs@PEI, HCl, KBr and  $\text{BrO}_3^-$  anions were  $6.0 \mu\text{g mL}^{-1}$ , 0.12 M, 0.46 mM and  $0.20 \mu\text{M}$ , respectively. Interaction time was 1 h. The error bars were obtained from the standard deviation of three parallel measurements.

## 10 Figure S9: The change of PL intensity of the sensing system with increasing KBr and $\text{BrO}_3^-$ anions

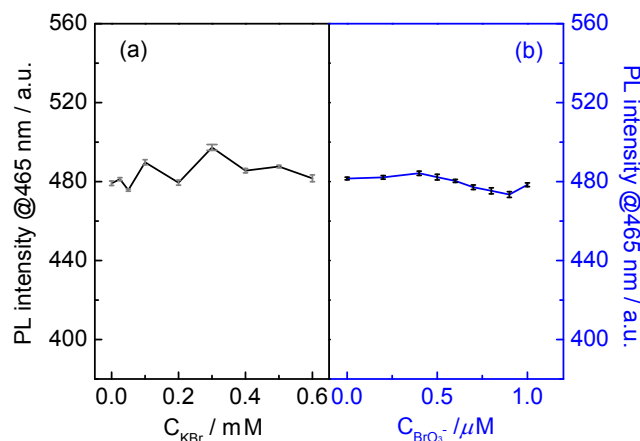

**Fig.S9.** The change of PL intensity @465 nm of this sensing system with increasing KBr (a) and BrO<sub>3</sub><sup>-</sup> anions (b). CDs@PEI and HCl concentrations were 6.0 μg mL<sup>-1</sup> and 0.12 M, respectively. Interaction time was 2.5 h. The error bars were obtained from the standard deviation of three parallel measurements.

## 11 The related calculation of thermodynamic

According to the half-reaction of electrode pair of Eq.1 and its standard electrode potential,

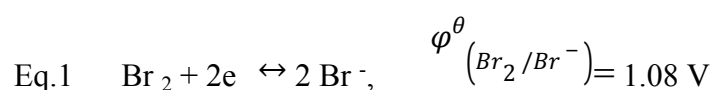

The electrode potential of  $\varphi_{(\text{Br}_2/\text{Br}^-)}$  under experimental conditions could be calculated, according to the Nernst equation (formulae. 1),

$$\begin{aligned} \varphi_{(\text{Br}_2/\text{Br}^-)} &= 1.08 + (0.059/2) \times \lg([\text{Br}_2]/[\text{Br}^-]^2) \\ &= 1.08 + (0.059/2) \times \lg(1/[4.6 \times 10^{-4}]^2) \\ &= 1.28 \text{ V} \end{aligned}$$

Furthermore, the half-reaction of electrode pair of Eq.2 and its

standard electrode potential,

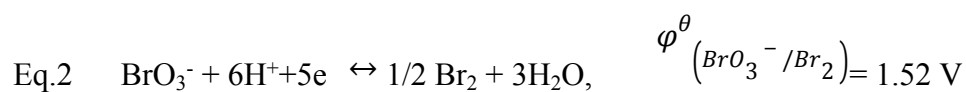

According to the Nernst equation, the electrode potential of  $\varphi_{(\text{BrO}_3^-/\text{Br}_2)}$  under experimental conditions could be calculated,

$$\begin{aligned} \varphi_{(\text{BrO}_3^-/\text{Br}_2)} &= 1.52 + (0.059/5) \times \lg([ \text{BrO}_3^- ] [ \text{H}^+ ]^6 / [ \text{Br}_2 ]^{1/2}) \\ &= 1.52 + (0.059/5) \times \lg(0.6 \times 10^{-6} \times 0.12^6 / 1) \\ &= 1.51 \text{ V} \end{aligned}$$

Therefore, the difference of two electrode potentials  $\Delta\varphi$  could be calculated to be 0.23 V.

According to the equation of  $\Delta G = -n\Delta\varphi F$ ,

$$\Delta G = -22.20 \text{ kJ mol}^{-1} < 0$$

Therefore, the following reaction should occur, which will generate active  $\text{Br}_3^-$  anions.

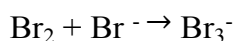

Supplement: c6ra12936f1.pdf [file c6ra12936f1.pdf]
